# Supplementary material
Source: publisher site journal article supplement (https://www.dovepress.com/article/366795)
Supplement: Supplementary file 1 [file get_supplementary_file.php]

# SHORT-TERM OXYGEN THERAPY OUTCOMES IN COPD

## Online Supplement

Thibaud Soumagne MD, François Maltais MD, François Corbeil MD, Bruno Paradis MD, Marc Baltzan MD, Paula Simão MD, Araceli Abad Fernández MD, Richard Lecours MD, Sarah Bernard MSc, and Yves Lacasse MD, for the INOX Trial Group.

### TABLE OF CONTENT

|                                                   | Page |
|---------------------------------------------------|------|
| INOX trial group - Complete list of investigators | 2    |
| Steering Committee                                | 3    |
| Data Safety and Monitoring Board                  | 3    |
| Coordinating center                               | 3    |

## **INOX TRIAL GROUP - COMPLETE LIST OF INVESTIGATORS**

**Canada:** Centre hospitalier affilié universitaire régional de Trois-Rivières, Trois-Rivières (Dr. François Corbeil, Dr. Christine Drapeau); Institut universitaire de cardiologie et de pneumologie de Québec-Université Laval, Québec (Dr. François Maltais); Mount Sinai Hospital, Montreal (Dr. Marc Baltzan); Centre intégré de santé et de services sociaux de Laval, Laval (Dr. Bruno Paradis); Montreal Chest Institute, Research Institute of the MUHC and McGill University, Montreal (Dr. Jean Bourbeau); Hôtel-Dieu de Lévis, Lévis (Dr. Richard Lecours); The Ottawa Hospital – General Campus, Ottawa (Dr. Shawn D. Aaron); Georges-L.-Dumont University Hospital Centre, Moncton (Dr. Marcel Mallet); Centre hospitalier universitaire de Sherbrooke, Sherbrooke (Dr. Pierre Larivée); Hôpital Sacré-Coeur, Montréal (Dr. Marcel Julien); Vancouver General Hospital, University of British Columbia, Vancouver (Dr. Jeremy Road); St. Boniface General Hospital, Winnipeg (Dr. Martha Sheperdecky); Kingston General Hospital, Kingston (Dr. Denis O’Donnell); Hôpital régional de Saint-Jérôme, Saint-Jérôme (Dr. Guy Cournoyer); University of Alberta Hospital, Edmonton (Dr. Eric Wong)

**Portugal:** Hospital Pedro Hispano ULS Matosinhos, Matosinhos (Dr. Paula Simão); Centro Hospitalar Vila Nova de Gaia / Espinho EPE, Vila Nova de Gaia (Dr. Miguel Guimarães); Centro Hospitalar Universitário de Coimbra- Hospital Geral, Coimbra (Dr. Cidália Rodrigues); Hospital Pulido Valente, Centro Hospitalar de Lisboa Norte, Lisboa (Dr. Paula Pinto); Centro Hospitalar Universitário do Algarve - Hospital de Portimão, Portimão (Dr. João Munhá); Centro Hospitalar Universitário Cova da Beira, Covilhã (Dr. Inês Vicente)

**Spain:** Hospital Universitario de Getafe, Getafe (Dr. Araceli Abad Fernández, Dr. Irene Cano); Hospital Universitario Galdakao-Usansolo, Galdakao (Dr. Cristóbal Esteban, Dr. Amaia Garcia-Loizaga); Hospital Universitario – Site Hospital Santiago Apostol, Vitoria-Gasteiz (Dr. Carlos Javier Egea Santaolalla); Hospital Universitario 12 de Octubre, Madrid (Dr. Javier Sayas Catalán)

**France:** CHU de Poitiers, Poitiers (Dr. Jean-Claude Meurice); Hôpital Nord, Marseille (Dr. Alain Palot, Dr. Pascal Chanez); Groupe Hospitalier Pitié Salpêtrière, Paris (Dr. Jésus Gonzalez)

### **STEERING COMMITTEE**

Dr. Yves Lacasse (Principal Investigator), Dr. François Maltais, Dr. Frédéric Sériès, Van Hung Nguyen (Health Economist), Sarah Bernard (Study Coordinator), Institut universitaire de cardiologie et de pneumologie de Québec, Quebec, Canada; Dr. Jean Bourbeau, Montreal Chest Institute, McGill University, Montreal, Canada; Dr. Shawn D. Aaron, The Ottawa Hospital – General Campus, University of Ottawa, Ottawa, Canada.

### **DATA SAFETY AND MONITORING BOARD**

Chair: Dr. James Brophy, Department of Epidemiology, Biostatistics, and Occupational Health, and Division of Cardiology, McGill University, Montreal, Canada.

Members: Dr. Nick Anthonisen, Faculty of Medicine, University of Manitoba Winnipeg, MB, Canada; Dr. Robin Roberts, Department of Clinical Epidemiology and Biostatistics, McMaster University, Hamilton, Canada; Dr. Kevin Schwartzman; Respiratory Division, Montreal Chest Institute, Respiratory Epidemiology and Clinical Research Unit, McGill University, Montreal, Quebec, Canada.

### **COORDINATING CENTER**

Sarah Bernard (Study Coordinator), Emmanuelle Bernard, Serge Simard (Statistician), Gaétan Daigle (Consulting Statistician, Department of Mathematics and Statistics, Laval University, Québec, Canada).
